# Supplementary material
Source: Springer Nature journal article supplement (https://www.springermedizin.de/resource/supplementary/13052_2014_378_MOESM1_ESM.pdf/9672004)

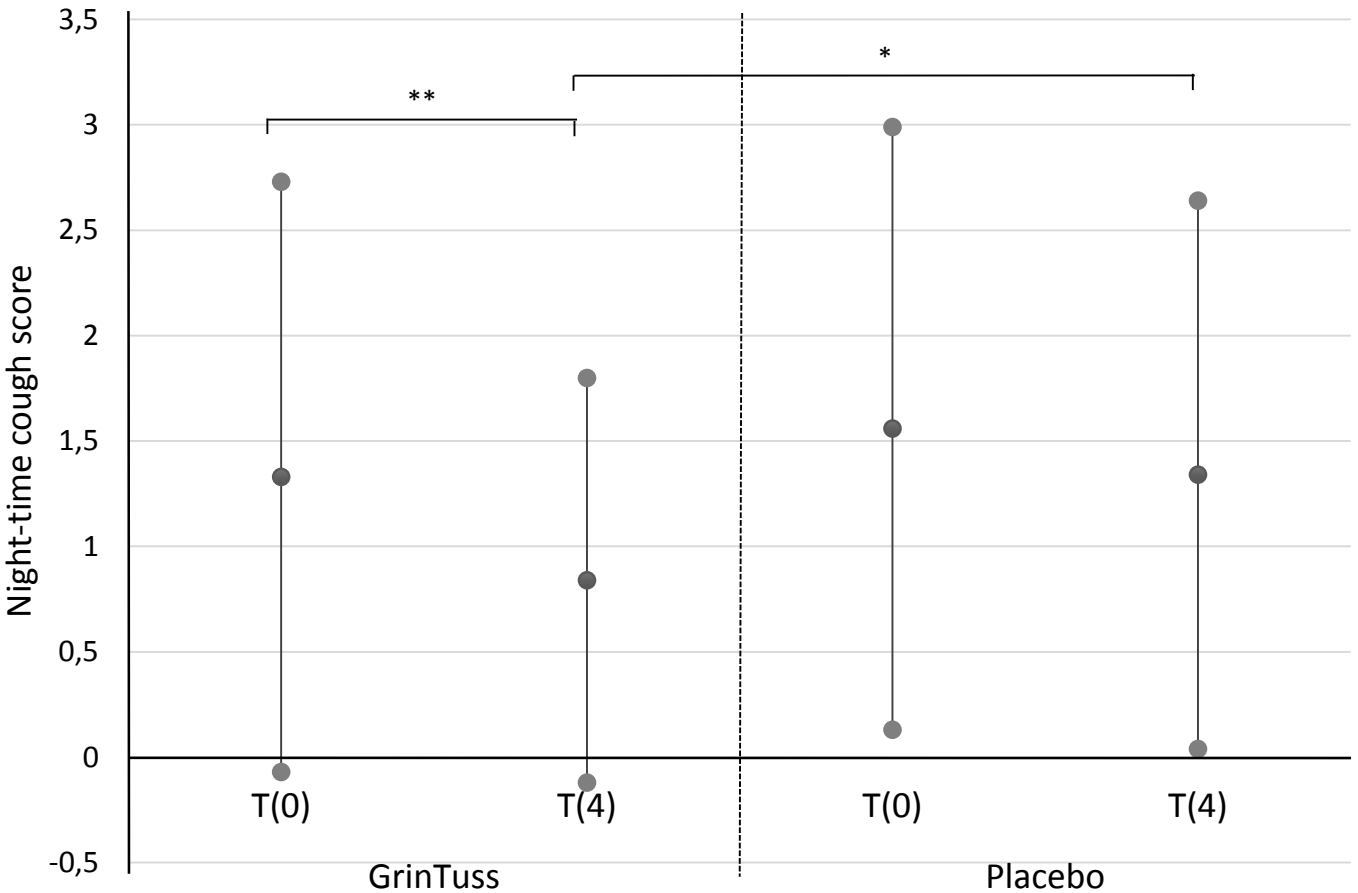

Supplement: MOESM1 [file 9672004]
